# Supplementary material
Source: HighWire-hosted journal article supplement (https://bmjopen.bmj.com/content/11/7/e053184)
Supplement: inline-supplementary-material-1 [file inline-supplementary-material-1.pdf]

**Supplementary File 1: Search strategy**

PsycINFO (OVID). Search conducted on November 17, 2020.

*Example.*

| Search | Query                                                                                                                        | Records Retrieved |
|--------|------------------------------------------------------------------------------------------------------------------------------|-------------------|
| #1     | exp Siblings/ or sibling*.mp.                                                                                                | 30852             |
| #2     | exp SISTERS/ or sister*.mp.                                                                                                  | 6420              |
| #3     | exp BROTHERS/ or brother*.mp.                                                                                                | 6533              |
| #4     | disab*.mp.                                                                                                                   | 167345            |
| #5     | ((neurodevelopmental or intellectual* or developmental*) adj2 (disab* or retard* or impair* or difficult* or disorder*)).mp. | 75165             |
| #6     | cerebral palsy.mp. or exp Cerebral Palsy/                                                                                    | 8350              |
| #7     | (cerebral adj palsy).mp.                                                                                                     | 7984              |
| #8     | autism spectrum disorder.mp. or exp Autism Spectrum Disorders/ or Asperger*.mp. or ASD.mp.                                   | 48706             |
| #9     | pervasive developmental disorder*.mp.                                                                                        | 3221              |
| #10    | spina bifida.mp. or exp Spina Bifida/                                                                                        | 1197              |
| #11    | exp EPILEPSY/ or epilepsy.mp.                                                                                                | 39992             |
| #12    | exp Fetal Alcohol Syndrome/ or fetal alcohol spectrum disorder*.mp. or FASD.mp.                                              | 2548              |
| #13    | exp Neurodevelopmental Disorders/ or neurodevelopmental disorder.mp.                                                         | 161860            |
| #14    | exp Learning Disabilities/                                                                                                   | 27715             |
| #15    | learning disab*.mp.                                                                                                          | 27680             |
| #16    | exp Stuttering/                                                                                                              | 4358              |
| #17    | stutter*.mp.                                                                                                                 | 6071              |
| #18    | exp Attention Deficit Disorder with Hyperactivity/                                                                           | 25804             |

|     |                                                                            |       |
|-----|----------------------------------------------------------------------------|-------|
| #19 | (attention deficit adj 2 disorder*).mp.                                    | 0     |
| #20 | ADHD.mp.                                                                   | 29847 |
| #21 | developmental coordination disorder*.mp.                                   | 1184  |
| #22 | developmental co-ordination disorder*.mp.                                  | 50    |
| #23 | DCD.mp.                                                                    | 946   |
| #24 | tic disorder*.mp.                                                          | 1656  |
| #25 | exp Tourette Syndrome/                                                     | 3201  |
| #26 | (tourette* adj2 (disease* or disorder* or syndrome*)).mp.                  | 4230  |
| #27 | exp Down's Syndrome/                                                       | 6325  |
| #28 | down* syndrom*.mp.                                                         | 8427  |
| #29 | exp Specific Language Impairment/ or specific language impairment*.mp.     | 2954  |
| #30 | exp Intellectual Development Disorder/                                     | 45029 |
| #31 | dyscalculia.mp. or exp Acalculia/ or acalculia.mp.                         | 914   |
| #32 | (alcohol related adj2 (birth defect* or neurodevelopmental disorder*)).mp. | 116   |
| #33 | exp Fragile X Syndrome/                                                    | 1836  |
| #34 | Fragile X syndrom*.mp.                                                     | 2502  |
| #35 | fraxa syndrom*.mp.                                                         | 0     |
| #36 | fraxe syndrom*.mp.                                                         | 0     |
| #37 | exp Klinefelters Syndrome/                                                 | 231   |

|     |                                  |       |
|-----|----------------------------------|-------|
| #38 | Klinefelter* syndrom*.mp.        | 385   |
| #39 | XXY.mp.                          | 232   |
| #40 | Lesch Nyhan syndrom*.mp.         | 171   |
| #41 | Lesch-Nyhan syndrom*.mp.         | 171   |
| #42 | lowe syndrom*.mp.                | 10    |
| #43 | cerebro oculo renal syndrom*.mp. | 0     |
| #44 | marfan* syndrom*.mp.             | 79    |
| #45 | exp Neurofibromatosis/           | 16511 |
| #46 | neurofibromatos* 1.mp.           | 356   |
| #47 | neurofibromatos* i.mp.           | 5     |
| #48 | Trisomy 21.mp.                   | 421   |
| #49 | Noonan syndrom*.mp.              | 70    |
| #50 | exp Prader Willi Syndrome/       | 546   |
| #51 | prader willi syndrom*.mp.        | 802   |
| #52 | exp Rett Syndrome                | 897   |
| #53 | rett* syndrom*.mp.               | 1323  |
| #54 | rett disorder.mp.                | 27    |
| #55 | Rubinstein syndrom*.mp.          | 0     |
| #56 | rubinstein taybi syndrom*.mp.    | 58    |
| #57 | tuberous sclerosis.mp.           | 700   |
| #58 | exp Turners Syndrome/            | 372   |
| #59 | turner* syndrom*.mp.             | 552   |
| #60 | exp Williams Syndrome/           | 1036  |
| #61 | william* syndrom*.mp.            | 1349  |
| #62 | williams-beuren syndrom*.mp.     | 77    |

|     |                                                                                |       |
|-----|--------------------------------------------------------------------------------|-------|
| #63 | exp Cleft Palate/                                                              | 491   |
| #64 | cleft pal?at*.mp.                                                              | 819   |
| #65 | velo-cardio-facial syndrom*.mp.                                                | 156   |
| #66 | velocardiofacial syndrom*.mp.                                                  | 175   |
| #67 | exp Trisomy/                                                                   | 211   |
| #68 | edward* syndrom*.mp.                                                           | 7     |
| #69 | trisomy 18.mp.                                                                 | 42    |
| #70 | exp Dyslexia/                                                                  | 6845  |
| #71 | dyslexia*.mp.                                                                  | 10796 |
| #72 | (reading adj3 (disabil* or retard* or impair* or difficult* or disorder*)).mp. | 12073 |
| #73 | clumsy child*.mp.                                                              | 78    |
| #74 | exp Speech Disorders/                                                          | 29028 |
| #75 | speech sound disorder*.mp.                                                     | 454   |
| #76 | exp Articulation Disorders/                                                    | 1642  |
| #77 | articulation disorder*.mp.                                                     | 1366  |
| #78 | phonetic disorder*.mp.                                                         | 8     |
| #79 | exp Language Disorders/                                                        | 38037 |
| #80 | (language adj (disorder* or impair* or defici*)).mp.                           | 13016 |
| #81 | disorder language.mp.                                                          | 47    |
| #82 | language development disorder*.mp.                                             | 3617  |
| #83 | exp Phenylketonuria/                                                           | 414   |
| #84 | phenylketonuria*.mp.                                                           | 748   |
| #85 | PKU.mp.                                                                        | 345   |
| #86 | exp Cornelia De Lange Syndrome/                                                | 44    |
| #87 | cornelia de lange syndrom*.mp.                                                 | 85    |

|      |                                                                                                              |         |
|------|--------------------------------------------------------------------------------------------------------------|---------|
| #88  | de lange* syndrom*.mp.                                                                                       | 105     |
| #89  | Duchenne muscular dystrophy.mp.                                                                              | 635     |
| #90  | XXY karyotype*.mp.                                                                                           | 20      |
| #91  | karyotype* xxy.mp.                                                                                           | 3       |
| #92  | (XXX and (female* or karyotype or chromosome or trisomy)).mp.                                                | 86      |
| #93  | developmental disabilities/ or learning disorders/ or intellectual disability/ or motor skills disorders.mp. | 16064   |
| #94  | exp Crying Cat Syndrome/                                                                                     | 73      |
| #95  | cri du chat syndrom*.mp.                                                                                     | 98      |
| #96  | happy puppet syndrom*.mp.                                                                                    | 3       |
| #97  | angelman syndrom*.mp.                                                                                        | 436     |
| #98  | galactos?emia*.mp.                                                                                           | 46      |
| #99  | exp Deaf/ or exp Hearing Disorders/ or hearing loss.mp.                                                      | 23720   |
| #100 | exp Blind/ or exp Vision Disorders/                                                                          | 17124   |
| #101 | (blind or blindness).mp.                                                                                     | 48324   |
| #102 | (visual adj1 (impair* or loss or disorder* or disabil* or difficult*)).mp.                                   | 5537    |
| #103 | program*.mp.                                                                                                 | 438137  |
| #104 | exp Program Development/ or exp Program Evaluation/                                                          | 28670   |
| #105 | resource*.mp.                                                                                                | 183369  |
| #106 | exp Training/ or train*.mp.                                                                                  | 351618  |
| #107 | intervention*.mp. or exp Intervention/                                                                       | 413366  |
| #108 | educat*.mp.                                                                                                  | 661227  |
| #109 | workshop*.mp.                                                                                                | 17726   |
| #110 | or/1-3                                                                                                       | 38256   |
| #111 | or/4-102                                                                                                     | 452686  |
| #112 | or/103-109                                                                                                   | 1470551 |

|      |             |      |
|------|-------------|------|
| #113 | and/110-112 | 1647 |
|------|-------------|------|
